# Supplementary material for: Identification of reference genes for RT-qPCR in the Antarctic moss Sanionia uncinata under abiotic stress conditions
Source: PubMed Central journal article supplement (PMC6007896; doi:10.1371/journal.pone.0199356), 2018-06-19

**A**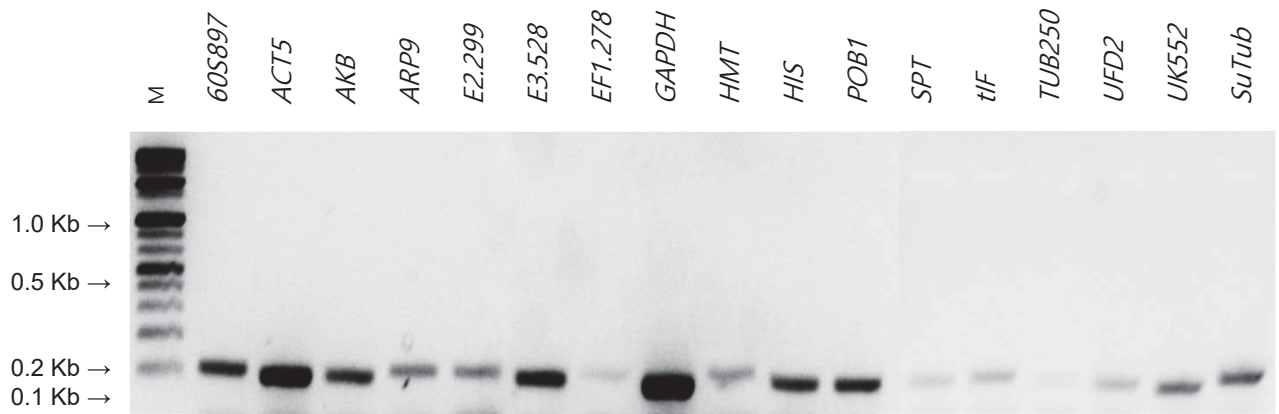**B**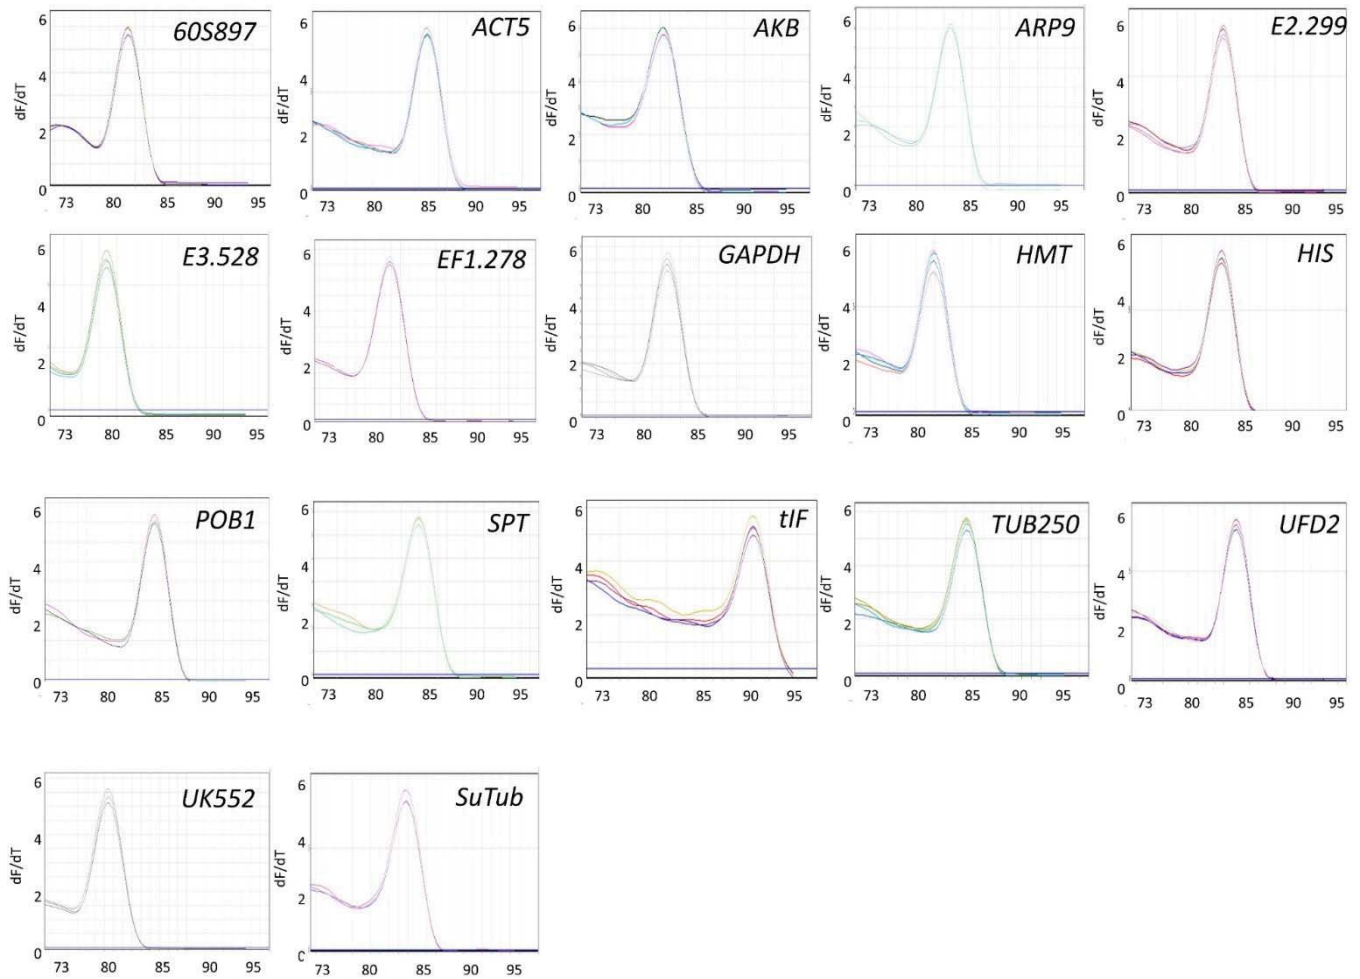

Supplement: pone.0199356.s002.pdf [file pone.0199356.s002.pdf]
