# Supplementary material for: Identification of reference genes for RT-qPCR in the Antarctic moss Sanionia uncinata under abiotic stress conditions
Source: PubMed Central journal article supplement (PMC6007896; doi:10.1371/journal.pone.0199356), 2018-06-19
Supplement: pone.0199356.s003.pdf [file pone.0199356.s003.pdf]

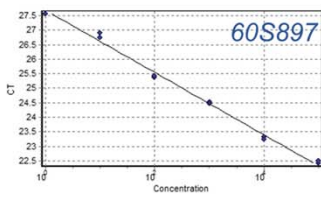

• standard  
PCR efficiency(%)=105.72  
R<sup>2</sup>=0.996

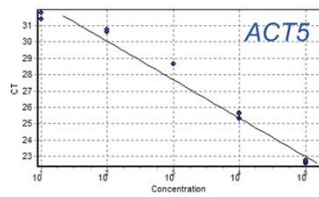

• standard  
PCR efficiency(%)=96.03  
R<sup>2</sup>=0.982

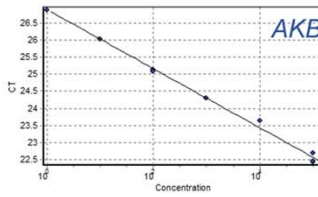

• standard  
PCR efficiency(%)=100.25  
R<sup>2</sup>=0.994

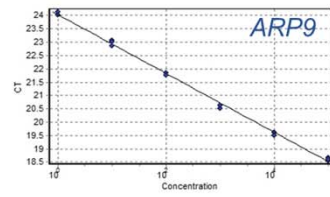

• standard  
PCR efficiency(%)=99.54  
R<sup>2</sup>=0.996

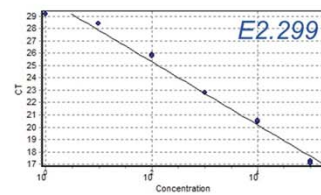

• standard  
PCR efficiency(%)=101.05  
R<sup>2</sup>=0.998

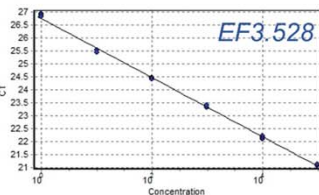

• standard  
PCR efficiency(%)=102.17  
R<sup>2</sup>=0.993

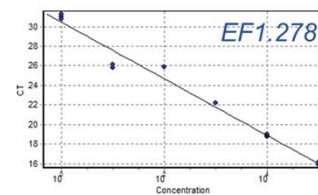

• standard  
PCR efficiency(%)=97.2  
R<sup>2</sup>=0.984

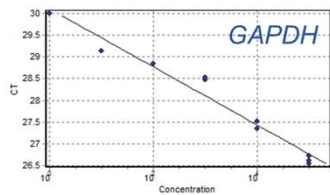

• standard  
PCR efficiency(%)=104.26  
R<sup>2</sup>=0.998

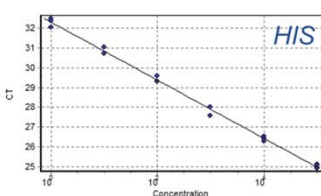

• standard  
PCR efficiency(%)=99.83  
R<sup>2</sup>=0.996

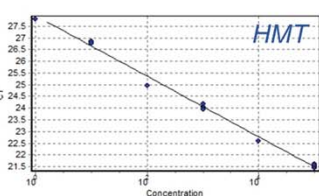

• standard  
PCR efficiency(%)=101.39  
R<sup>2</sup>=0.995

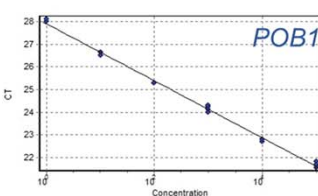

• standard  
PCR efficiency(%)=94.96  
R<sup>2</sup>=0.997

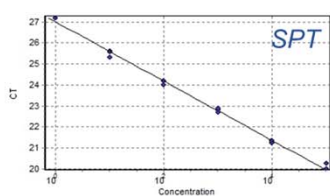

• standard  
PCR efficiency(%)=103.05  
R<sup>2</sup>=0.997

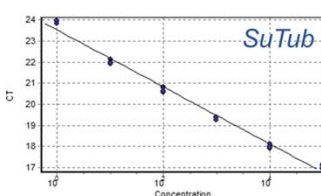

• standard  
PCR efficiency(%)=95.34  
R<sup>2</sup>=0.992

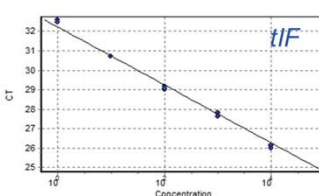

• standard  
PCR efficiency(%)=99.79  
R<sup>2</sup>=0.985

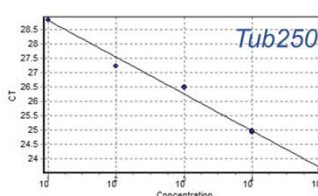

• standard  
PCR efficiency(%)=94.14  
R<sup>2</sup>=0.996

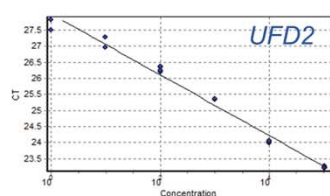

• standard  
PCR efficiency(%)=95.82  
R<sup>2</sup>=0.997

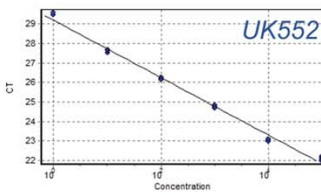

• standard  
PCR efficiency(%)=97.63  
R<sup>2</sup>=0.999
